# Supplementary material
Source: PubMed Central journal article supplement (PMC5726261)
Supplement: NIHMS924098-supplement-Supplemental.pdf [file NIHMS924098-supplement-Supplemental.pdf]

*Supporting Information*

*for*

**Clinical Variants of New Delhi Metallo- $\beta$ -Lactamase Are Evolving to Overcome Zinc  
Scarcity**

*Alesha C. Stewart, Christopher R. Bethel, Jamie VanPelt, Alex Bergstrom, Zishuo Cheng, Callie  
G. Miller, Cameron Williams, Robert Poth, Matthew Morris, Olivia Lahey, Jay C. Nix, David L.  
Tierney,\* Richard C. Page,\* Michael W. Crowder,\* Robert A. Bonomo\*, and Walter Fast\**

**Table of Contents:**

|                                                                 |     |
|-----------------------------------------------------------------|-----|
| Structures of $\beta$ -lactams used in this study.....          | S2  |
| MIC values for NDM Variants with Various Antibiotics.....       | S3  |
| UV-Vis Spectra of Dicobalt(II) NDM Variants.....                | S9  |
| <sup>1</sup> H-NMR Spectrum of Zn(II)Co(II) NDM-1 variants..... | S10 |
| Primers Used For Site-Directed Mutagenesis.....                 | S11 |

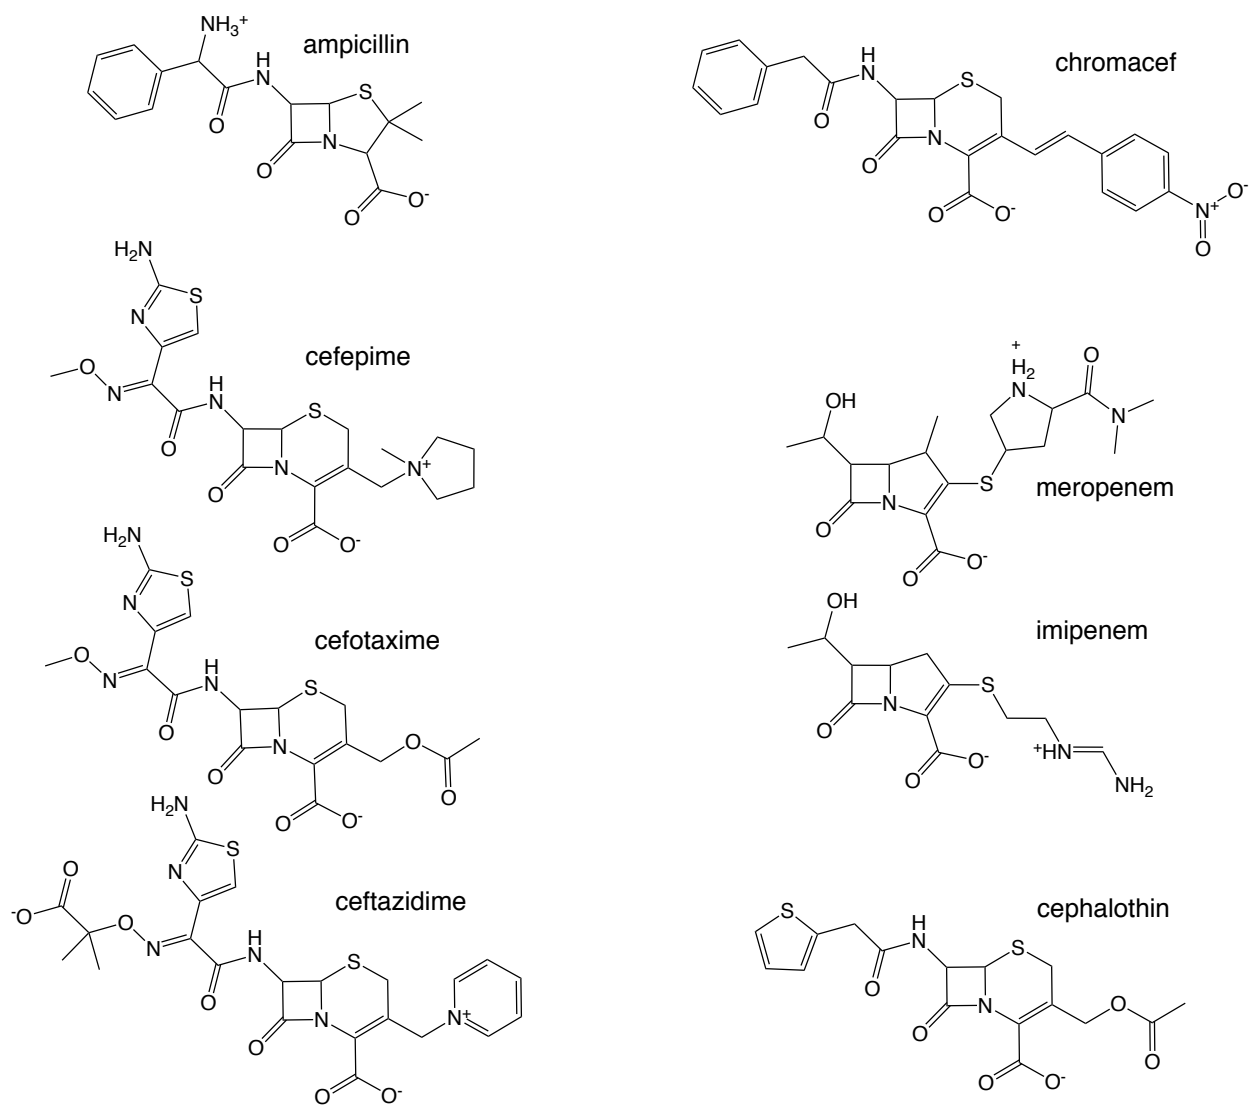

**Figure S1.** Structures of  $\beta$ -lactams used in this study

**Table S1.** MIC values for imipenem with NDM variants substituted at position 154 in standard and zinc(II) limited conditions

| Strain   | MIC (mg/L)<br>Standard Conditions <sup>a</sup> | MIC (mg/L)<br>EDTA (50 $\mu$ M) <sup>a</sup> |
|----------|------------------------------------------------|----------------------------------------------|
| pHSG298  | 0.25                                           | 0.25                                         |
| NDM 154M | 64                                             | 0.5                                          |
| NDM 154L | 64                                             | 4                                            |
| NDM 154I | 64                                             | 0.5                                          |
| NDM 154F | 64                                             | 0.5                                          |
| NDM 154V | 64                                             | 1                                            |
| NDM 154W | 16                                             | 0.25                                         |
| NDM 154G | 8                                              | 0.25                                         |
| NDM 154Q | 32                                             | 0.25                                         |
| NDM 154K | 8                                              | 0.25                                         |
| NDM 154E | 2                                              | 0.25                                         |
| NDM 154A | 8                                              | 0.25                                         |
| NDM 154D | 0.5                                            | 0.25                                         |
| NDM 154N | 16                                             | 0.25                                         |
| NDM 154P | 0.5                                            | 0.25                                         |
| NDM 154S | 8                                              | 0.25                                         |
| NDM 154T | 16                                             | 0.25                                         |
| NDM 154Y | 32                                             | 0.5                                          |
| NDM 154C | 8                                              | 0.25                                         |
| NDM 154H | 32                                             | 0.25                                         |
| NDM 154R | 8                                              | 0.25                                         |
| NDM-12   | 64                                             | 4                                            |

<sup>a</sup>Results from three biological replicates

**Table S2.** MIC values for cephalothin with NDM variants substituted at position 154 in standard and zinc(II) limited conditions

| Strain   | MIC (mg/L)<br>Standard Conditions <sup>a</sup> | MIC (mg/L)<br>EDTA (50 $\mu$ M) <sup>a</sup> |
|----------|------------------------------------------------|----------------------------------------------|
| pHSG298  | 4                                              | 4                                            |
| NDM 154M | > 1024                                         | 128                                          |
| NDM 154L | > 1024                                         | 512                                          |
| NDM 154I | > 1024                                         | 64                                           |
| NDM 154F | > 1024                                         | 64                                           |
| NDM 154V | > 1024                                         | 128                                          |
| NDM 154W | > 1024                                         | 32                                           |
| NDM 154G | 512                                            | 16                                           |
| NDM 154Q | > 1024                                         | 16                                           |
| NDM 154K | 512                                            | 8                                            |
| NDM 154E | 512                                            | 8                                            |
| NDM 154A | 1024                                           | 8                                            |
| NDM 154D | 128                                            | 4                                            |
| NDM 154N | 1024                                           | 8                                            |
| NDM 154P | 128                                            | 4                                            |
| NDM 154S | 512                                            | 8                                            |
| NDM 154T | 1024                                           | 16                                           |
| NDM 154Y | > 1024                                         | 32                                           |
| NDM 154C | 1024                                           | 8                                            |
| NDM 154H | > 1024                                         | 16                                           |
| NDM 154R | 512                                            | 16                                           |
| NDM-12   | >1024                                          | 512                                          |

<sup>a</sup>Results from three biological replicates

**Table S3.** MIC values for ceftazidime with NDM variants substituted at position 154 in standard and zinc(II) limited conditions

| Strain   | MIC (mg/L)<br>Standard Conditions <sup>a</sup> | MIC (mg/L)<br>EDTA (50 $\mu$ M) <sup>a</sup> |
|----------|------------------------------------------------|----------------------------------------------|
| pHSG298  | 0.25                                           | 0.25                                         |
| NDM 154M | > 512                                          | > 512                                        |
| NDM 154L | > 512                                          | > 512                                        |
| NDM 154I | > 512                                          | 512                                          |
| NDM 154F | > 512                                          | 256                                          |
| NDM 154V | > 512                                          | > 512                                        |
| NDM 154W | > 512                                          | 128                                          |
| NDM 154G | > 512                                          | 16                                           |
| NDM 154Q | > 512                                          | 128                                          |
| NDM 154K | > 512                                          | 16                                           |
| NDM 154E | > 512                                          | 2                                            |
| NDM 154A | > 512                                          | 16                                           |
| NDM 154D | 512                                            | 1                                            |
| NDM 154N | > 512                                          | 32                                           |
| NDM 154P | 512                                            | 1                                            |
| NDM 154S | > 512                                          | 8                                            |
| NDM 154T | > 512                                          | 32                                           |
| NDM 154Y | > 512                                          | 256                                          |
| NDM 154C | > 512                                          | 16                                           |
| NDM 154H | > 512                                          | 128                                          |
| NDM 154R | > 512                                          | 32                                           |
| NDM-12   | >512                                           | >512                                         |

<sup>a</sup>Results from three biological replicates

**Table S4.** MIC values for cefotaxime with NDM variants substituted at position 154 in standard and zinc(II) limited conditions

| Strain   | MIC (mg/L)<br>Standard Conditions <sup>a</sup> | MIC (mg/L)<br>EDTA (50 $\mu$ M) <sup>a</sup> |
|----------|------------------------------------------------|----------------------------------------------|
| pHSG298  | $\leq 0.06$                                    | $\leq 0.06$                                  |
| NDM 154M | > 128                                          | 32                                           |
| NDM 154L | > 128                                          | 128                                          |
| NDM 154I | > 128                                          | 16                                           |
| NDM 154F | > 128                                          | 16                                           |
| NDM 154V | > 128                                          | 32                                           |
| NDM 154W | > 128                                          | 2                                            |
| NDM 154G | 128                                            | 0.5                                          |
| NDM 154Q | > 128                                          | 2                                            |
| NDM 154K | > 128                                          | 0.5                                          |
| NDM 154E | 32                                             | $\leq 0.06$                                  |
| NDM 154A | > 128                                          | 0.5                                          |
| NDM 154D | 16                                             | $\leq 0.06$                                  |
| NDM 154N | > 128                                          | 0.5                                          |
| NDM 154P | 16                                             | $\leq 0.06$                                  |
| NDM 154S | 128                                            | 0.25                                         |
| NDM 154T | > 128                                          | 1                                            |
| NDM 154Y | > 128                                          | 8                                            |
| NDM 154C | > 128                                          | 0.5                                          |
| NDM 154H | > 128                                          | 2                                            |
| NDM 154R | > 128                                          | 1                                            |
| NDM-12   | >128                                           | 128                                          |

<sup>a</sup>Results from three biological replicates

**Table S5.** MIC values for cefepime with NDM variants substituted at position 154 in standard and zinc(II) limited conditions

| Strain   | MIC (mg/L)<br>Standard Conditions <sup>a</sup> | MIC (mg/L)<br>EDTA (50 $\mu$ M) <sup>a</sup> |
|----------|------------------------------------------------|----------------------------------------------|
| pHSG298  | 0.06                                           | 0.06                                         |
| NDM 154M | > 32                                           | 4                                            |
| NDM 154L | > 32                                           | 32                                           |
| NDM 154I | > 32                                           | 2                                            |
| NDM 154F | > 32                                           | 0.5                                          |
| NDM 154V | > 32                                           | 4                                            |
| NDM 154W | > 32                                           | 0.25                                         |
| NDM 154G | > 32                                           | 0.125                                        |
| NDM 154Q | > 32                                           | 0.25                                         |
| NDM 154K | > 32                                           | 0.125                                        |
| NDM 154E | 8                                              | 0.06                                         |
| NDM 154A | 32                                             | 0.125                                        |
| NDM 154D | 1                                              | 0.06                                         |
| NDM 154N | > 32                                           | 0.125                                        |
| NDM 154P | 1                                              | 0.06                                         |
| NDM 154S | 32                                             | 0.125                                        |
| NDM 154T | > 32                                           | 0.125                                        |
| NDM 154Y | > 32                                           | 0.5                                          |
| NDM 154C | 16                                             | 0.125                                        |
| NDM 154H | > 32                                           | 0.25                                         |
| NDM 154R | 32                                             | 0.125                                        |
| NDM-12   | > 32                                           | 32                                           |

<sup>a</sup>Results from three biological replicates

**Table S6.** MIC values for meropenem with NDM variants substituted at position 154 in standard and zinc(II) limited conditions

| Strain   | MIC (mg/L)<br>Standard Conditions <sup>a</sup> | MIC (mg/L)<br>EDTA (50 $\mu$ M) <sup>a</sup> |
|----------|------------------------------------------------|----------------------------------------------|
| pHSG298  | $\leq 0.06$                                    | $\leq 0.06$                                  |
| NDM 154M | 32                                             | 0.125                                        |
| NDM 154L | 32                                             | 0.5                                          |
| NDM 154I | 16                                             | 0.125                                        |
| NDM 154F | 32                                             | 0.125                                        |
| NDM 154V | 32                                             | 0.125                                        |
| NDM 154W | 16                                             | $\leq 0.06$                                  |
| NDM 154G | 2                                              | $\leq 0.06$                                  |
| NDM 154Q | 16                                             | $\leq 0.06$                                  |
| NDM 154K | 4                                              | $\leq 0.06$                                  |
| NDM 154E | 0.5                                            | $\leq 0.06$                                  |
| NDM 154A | 4                                              | $\leq 0.06$                                  |
| NDM 154D | 0.25                                           | $\leq 0.06$                                  |
| NDM 154N | 8                                              | $\leq 0.06$                                  |
| NDM 154P | 0.25                                           | $\leq 0.06$                                  |
| NDM 154S | 4                                              | $\leq 0.06$                                  |
| NDM 154T | 8                                              | $\leq 0.06$                                  |
| NDM 154Y | 16                                             | $\leq 0.06$                                  |
| NDM 154C | 2                                              | $\leq 0.06$                                  |
| NDM 154H | 16                                             | $\leq 0.06$                                  |
| NDM 154R | 8                                              | $\leq 0.06$                                  |
| NDM-12   | 32                                             | 2                                            |

<sup>a</sup>Results from two biological replicates



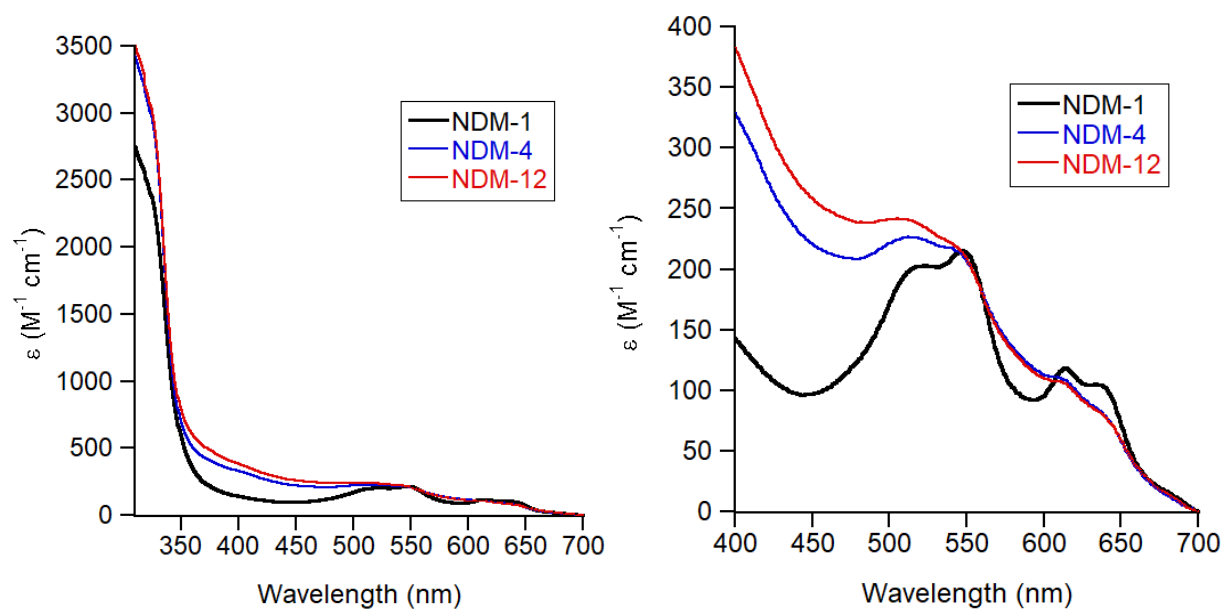

**Figure S2.** UV-visible spectra of dicobalt(II) NDM variants. (Left) full spectra, (Right), expansion of the ligand-field region. Each spectrum is blanked against buffer.

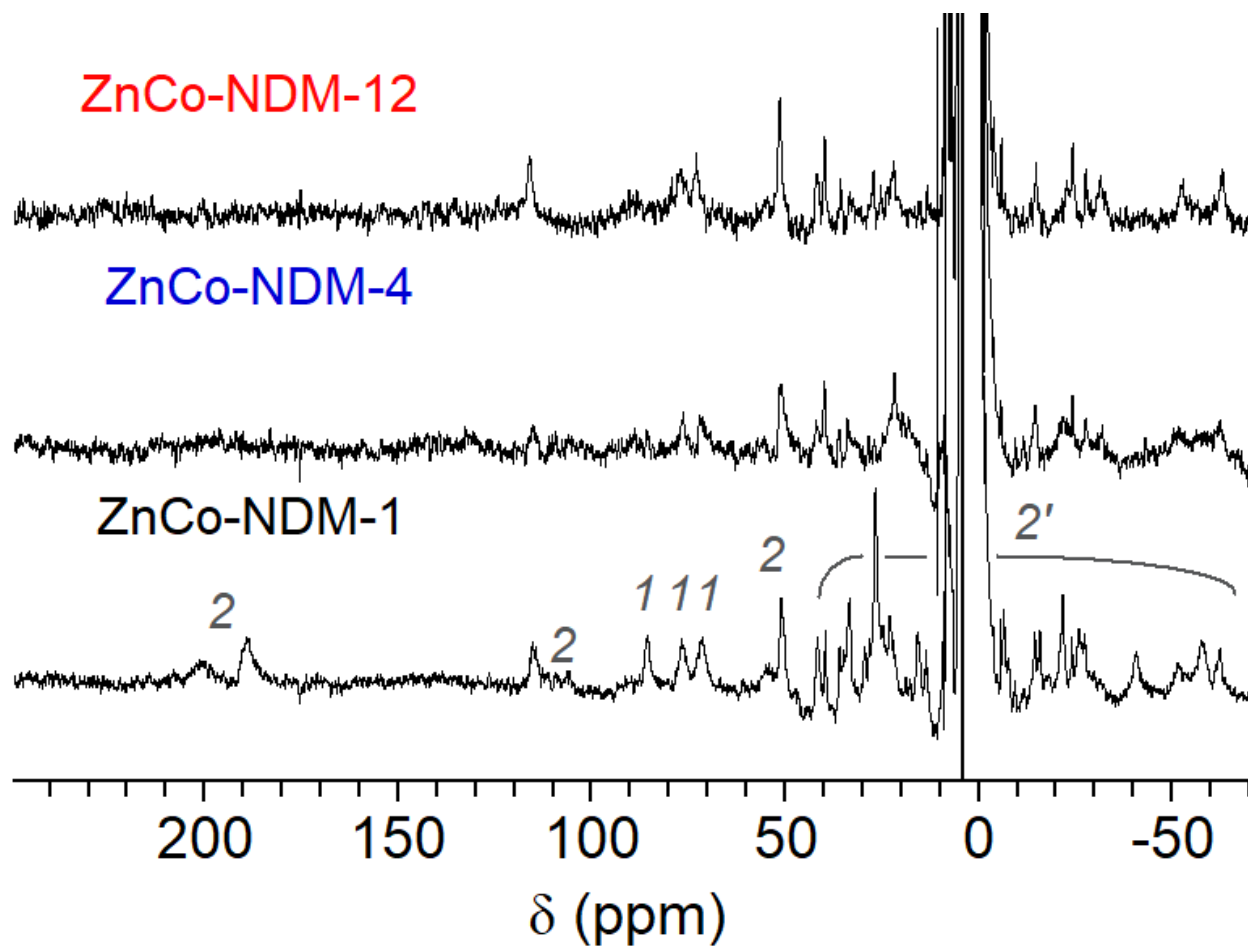

**Figure S3.** 300 MHz <sup>1</sup>H NMR spectra of the zinc(II)cobalt(II) NDM variants. The labels above the NDM-1 spectrum follow from Figure 7.

## Mutagenic Primers Encoding NDM-4 and NDM-12

The template DNA used for preparation of each mutated *bla*<sub>NDM</sub> gene (*bla*,  $\beta$ -lactamase) is noted and the mutated codons are underlined. Briefly, a plasmid encoding NDM-1 using codons optimized for expression in *E. coli* was the template for construction of NDM-4. The resulting NDM-4 encoding plasmid was used to generate a plasmid encoding NDM-12. These constructs were used to express NDM variants used for kinetic and spectroscopic experiments.

**Table S7.** Oligonucleotide Sequences Used for Site-Directed Mutagenesis

| Construct                                                      | Primer Sequences                                                                     |
|----------------------------------------------------------------|--------------------------------------------------------------------------------------|
| NDM-4 M154L<br>(template <i>bla</i> <sub>NDM-1</sub> )         | F: 5' -GCCCCGCAAGAGGGGCTGGTTGCGGCGCAAC-3'<br>R: 5' -GTTGCGCCGCAACCAGCCCTCTGCGGGGC-3' |
| NDM-12 M154L, G222D<br>(template <i>bla</i> <sub>NDM-4</sub> ) | F: 5' -GCTCGGCAATCTCGATGATGCCGACACTG-3'<br>R: 5' -CAGTGTCCGCATCATCGAGATTGCCGAGC-3'   |

## Mutagenic Primers Encoding Variants at the M154 Position

**Table S8.** Primer sequences used to generate variants at the NDM154 position for use in MIC determinations. Complimentary sequences are not shown.

| Primer     | Sequence (5' - 3')         |
|------------|----------------------------|
| NDM 154S   | AAGAGGGGTTCGGTTGCGGCGCAA   |
| NDM 154P   | AAGAGGGGCCGGTTGCGGCGCAA    |
| NDM 154T   | AAGAGGGGACGGTTGCGGCGCAA    |
| NDM 154A   | AAGAGGGGGCGGTTGCGGCGCAA    |
| NDM 154Y   | AAGAGGGGTACGTTGCGGCGCAA    |
| NDM 154H   | AAGAGGGGCACGTTGCGGCGCAA    |
| NDM 154N   | AAGAGGGGAACGTTGCGGCGCAA    |
| NDM 154D   | AAGAGGGGGACGTTGCGGCGCAA    |
| NDM 154C   | AAGAGGGGTGCGTTGCGGCGCAA    |
| NDM 154R   | AAGAGGGGCGCGTTGCGGCGCAA    |
| NDM 154VTG | GCAAGAGGGGVTGGTTGCGGCGCAAC |
| NDM 154DTC | GCAAGAGGGGDTCGTTGCGGCGCAAC |
| NDM 154BGG | GCAAGAGGGGBGGTTGCGGCGCAAC  |
| NDM 154VAG | GCAAGAGGGGVAGTTGCGGCGCAAC  |
